# Supplementary material for: Using Human ‘Personalized’ Cybrids to Identify Drugs/Agents That Can Regulate Chronic Lymphoblastic Leukemia Mitochondrial Dysfunction
Source: MDPI journal article supplement (doi:10.3390/ijms241311025), 2023-07-03
Supplement: s1 [file s1]

## Supplementary table

**Supplementary table S1:** SNPs found by Sanger sequencing in CLL cybrid

| <b>Loci:<br/>MT-</b> | <b>SNP</b>             | <b>AA change</b>                        | <b>Functional<br/>Loci: MT</b> | <b>rs#</b>  | <b>CLL-<br/>cybrid</b> | <b>Related pathogenesis</b>                                                                         | <b>Literature<br/>(PMID#)</b>                                                           | <b>Variants</b>               |
|----------------------|------------------------|-----------------------------------------|--------------------------------|-------------|------------------------|-----------------------------------------------------------------------------------------------------|-----------------------------------------------------------------------------------------|-------------------------------|
| DLOOP                | 73<br>A>G              | -                                       | Regulatory                     | rs869183622 | ND                     | Oncolytic adenoma, Ewing sarcoma,<br>Breast cancer, Lung cancer                                     | 28104394, 28245399,<br>24603941, 20055758                                               | ND                            |
| DLOOP                | 152<br>T>C             | -                                       | Regulatory                     | rs117135796 | L2                     | Bladder cancer, Lung cancer, Ovarian<br>carcinoma, Liver cancer,<br>Nasopharyngeal carcinoma, Aging | 26639157                                                                                | ND                            |
| RNR1                 | 1438<br>A>G            | -                                       | rRNA                           | rs2001030   | Non-H                  | Hearing loss, Polymorphic,<br>Cardiomyopathy, Benign                                                | 28104394, 18325329,<br>11938495, 20055758,<br>23826813, 19535463                        | ND                            |
| RNR1                 | 1598<br>G>A            | -                                       | rRNA                           | rs3135027   | N1b                    | Hearing loss, benign                                                                                | 20064630, 23826813                                                                      | Homoplasmic,<br>Heteroplasmic |
| RNR2                 | 1703<br>C>T            | -                                       | rRNA                           | rs28527344  | N1b1                   | Mito encephalopathy                                                                                 | 2102678                                                                                 | Heteroplasmic                 |
| RNR2                 | 1719<br>G>A            | -                                       | rRNA                           | rs3928305   | N1'5                   | Ischemic stroke                                                                                     | 18593462, 26883569,<br>11938495, 20055758,<br>25650108                                  | Homoplasmic,<br>Heteroplasmic |
| RNR2                 | 2639<br>C>T            | -                                       | rRNA                           | ND          | N1b                    | ND                                                                                                  | Unavailable                                                                             | ND                            |
| RNR2                 | 2706<br>A>G            | -                                       | rRNA                           | rs2854128   | Non-H                  | Cardiomyopathy, Hyperlactemia,<br>Anaemia, Asthenia, Hearing loss                                   | 28104394, 11024191,<br>11938495, 27217714,<br>20055758, 25650108,<br>28674062, 27323166 | ND                            |
| <b>RNR2</b>          | <b>2866<br/>A&gt;T</b> | -                                       | <b>rRNA</b>                    | <b>ND</b>   | <b>PVT-<br/>Unique</b> | ND                                                                                                  | Unavailable                                                                             | <b>ND</b>                     |
| ND1                  | 3921<br>C>A            | Synonymous<br>(Ser, aa position<br>205) | Coding                         | ND          | N1b1                   | ND                                                                                                  | Unavailable                                                                             | ND                            |
| ND2                  | 4735<br>C>A            | Thr→Asn, aa<br>position 89              | Coding                         | ND          | N1b1b                  | ND                                                                                                  | Unavailable                                                                             | ND                            |
| ND2                  | 4769<br>A>G            | Synonymous<br>(Met, aa position<br>100) | Coding                         | rs3021086   | Non-H                  | Protective in Alzheimer disease (AD),<br>Dementia, Mitochondrial myopathy                           | 28104394, 18325329                                                                      | ND                            |

|      |              |                                         |        |                   |                      |                                                                     |                                                        |                               |
|------|--------------|-----------------------------------------|--------|-------------------|----------------------|---------------------------------------------------------------------|--------------------------------------------------------|-------------------------------|
| ND2  | 4917<br>A>G  | Asn→Asp, aa<br>position 150             | Coding | rs28357980        | N1b1b                | Leber Hereditary Optic Neuropathy<br>(LHON), Alzheimer disease (AD) | 17152068, 1370613                                      | Homoplasmic                   |
| ND2  | 4960<br>C>T  | Ala→Val, aa<br>position 164             | Coding | ND                | N1b1                 | ND                                                                  | Unavailable                                            | Homoplasmic                   |
| ND2  | 5471<br>G>A  | Synonymous<br>(Thr, aa position<br>334) | Coding | ND                | N1b                  | ND                                                                  | Unavailable                                            | ND                            |
| CO1  | 7028<br>C>T  | Synonymous<br>(Ala, aa position<br>375) | Coding | rs2015062         | Non-H                | Mental retardation, Strabismus,<br>Ischemic stroke                  | 27033601, 26883569,<br>11938495, 20055758,<br>18593462 | ND                            |
| CO2  | 8251<br>G>A  | Synonymous<br>(Gly, aa position<br>222) | Coding | rs3021089         | N1b                  | ND                                                                  | Unavailable                                            | Homoplasmic                   |
| ATP8 | 8472<br>C>T  | Pro → Leu, aa<br>position 36            | Coding | ND                | N1b1                 | Autism                                                              | Unavailable                                            | Homoplasmic                   |
| ATP6 | 8836<br>A>G  | Met → Val, aa<br>position 104           | Coding | ND                | N1b                  | Leber Hereditary Optic Neuropathy<br>(LHON)                         | 29670542, 23508290,<br>30273650                        | Homoplasmic,<br>Heteroplasmic |
| ND3  | 10238<br>T>C | Synonymous<br>(Ile, aa position<br>60)  | Coding | <u>rs28358275</u> | N1                   | ND                                                                  | Unavailable                                            | Homoplasmic                   |
| ND4  | 11719<br>G>A | Synonymous<br>(Gly, aa position<br>320) | Coding | rs2853495         | Non-R                | Leber Hereditary Optic Neuropathy<br>(LHON), Neuropathy             | 28104394, 24603941,<br>11938495, 27323166              | ND                            |
| ND4  | 11928<br>A>G | Asn → Ser, aa<br>position 390           | Coding | ND                | N1b1b                | ND                                                                  | Unavailable                                            | Heteroplasmic                 |
| ND5  | 12501<br>G>A | Synonymous<br>(Met, aa position<br>55)  | Coding | rs28397767        | N1                   | ND                                                                  | Unavailable                                            | Homoplasmic                   |
| ND5  | 12705<br>C>A | Ile → Met, aa<br>position 123           | Coding | ND                | Non-R                | Mobility impairment                                                 | 30335417                                               | ND                            |
| ND5  | 12822<br>A>G | Synonymous<br>(Ala, aa position<br>162) | Coding | ND                | N1b1                 | ND                                                                  | Unavailable                                            | ND                            |
| ND5  | 13635<br>T>C | Synonymous<br>(Gly, aa position<br>433) | Coding | ND                | PVT-<br>ND5<br>(Syn) | Likely benign                                                       | <b>Unavailable</b>                                     | <b>ND</b>                     |

|       |              |                                         |            |             |        |                                                                                                                                    |                                                                                         |                               |
|-------|--------------|-----------------------------------------|------------|-------------|--------|------------------------------------------------------------------------------------------------------------------------------------|-----------------------------------------------------------------------------------------|-------------------------------|
| ND5   | 13710<br>A>G | Synonymous<br>(Ala, aa position<br>458) | Coding     | rs200295632 | N1b1b  | ND                                                                                                                                 | Unavailable                                                                             | Homoplasmic                   |
| ND6   | 14581<br>T>C | Synonymous<br>(Val, aa position<br>31)  | Coding     | ND          | N1b1b1 | ND                                                                                                                                 | Unavailable                                                                             | ND                            |
| CYB   | 14766<br>C>T | Thr → Ile, aa<br>position 7             | Coding     | rs193302980 | Non-H  | Breast cancer, Normal tension<br>glaucoma (NTG)                                                                                    | 28104394, 22475488,<br>11938495, 24448266,<br>22223843, 19682603                        | ND                            |
| CYB   | 15326<br>A>G | Thr → Ala, aa<br>position 194           | Coding     | rs2853508   | ND     | Breast cancer, Ataxia, Septo optical<br>dyslasia                                                                                   | 28104394, 25132006,<br>24102627, 11811990,<br>11938495, 22659402,<br>24448266, 19682603 | ND                            |
| DLOOP | 16145<br>G>A | -                                       | Regulatory | rs41419246  | N1b1   | ND                                                                                                                                 | Unavailable                                                                             | Homoplasmic                   |
| DLOOP | 16223<br>C>T | -                                       | Regulatory | rs2853513   | ND     | Mitochondrial disease, Breast cancer,<br>Bladder cancer, Lung cancer,<br>Nasopharyngeal carcinoma, Stomach<br>cancer, Liver cancer | 28104394, 24603941,<br>15240908, 20055758,<br>22930374                                  | ND                            |
| DLOOP | 16390<br>G>A | -                                       | Regulatory | rs41378955  | N1b    | Parkinson's disease, Bladder cancer,<br>Lung cancer, Breast cancer                                                                 | 27217714, 26883569,<br>22930374                                                         | Homoplasmic,<br>Heteroplasmic |
